# Supplementary material
Source: Springer Nature journal article supplement (https://www.springermedizin.de/resource/supplementary/12905_2012_504_MOESM3_ESM.pdf/9518634)

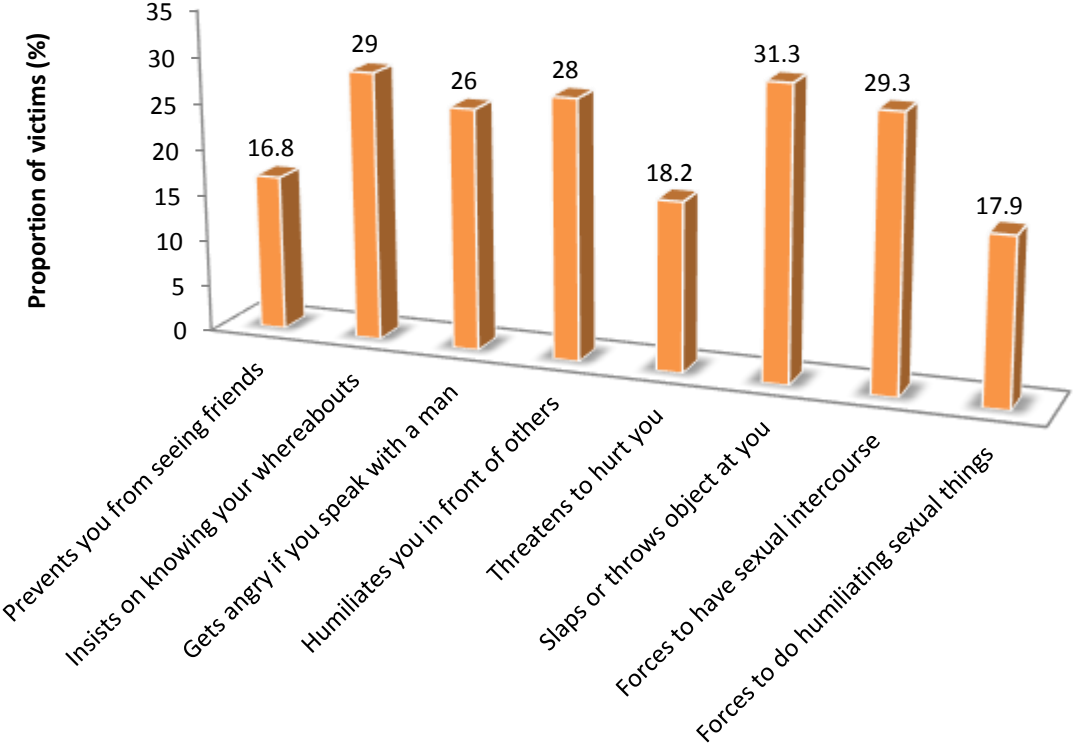

Supplement: MOESM3 [file 9518634]
